# Supplementary material for: An Au22(L8)6 nanocluster with in situ uncoordinated Au as a highly active catalyst for O2 activation and CO oxidation
Source: Royal Society of Chemistry journal article supplement (doi:10.1039/c9cp03469b), 2019-01-01
Supplement: c9cp03469b1.pdf [file c9cp03469b1.pdf]

## Supporting Information for:

# $\text{Au}_{22}(\text{L}^8)_6$ Nanocluster with *in situ* Uncoordinated Au as Highly Active Catalyst for $\text{O}_2$ Activation and CO Oxidation

Fuhua Li and Qing Tang\*

School of Chemistry and Chemical Engineering, Chongqing University, Chongqing  
401331, China

\*To whom correspondence should be addressed. E-mail: [qingtang@cqu.edu.cn](mailto:qingtang@cqu.edu.cn).

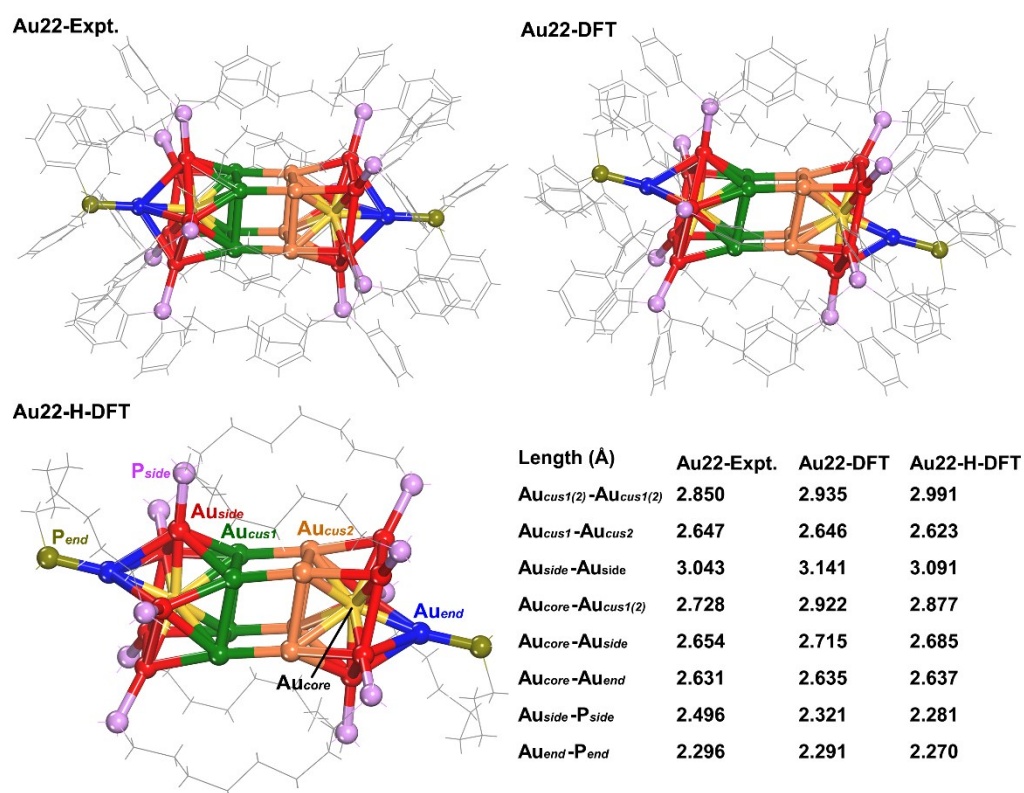

Fig. S1. The geometric structures and bond parameters of  $\text{Au}_{22}(\text{L}^8)_6$  nanocluster, where  $\text{Au}_{22}\text{-Expt.}$  and  $\text{Au}_{22}\text{-DFT}$  denotes the experimental and DFT-optimized structure based

on the experimental  $L^8$  ligands,  $Au_{22}(L^8)_6$ , where  $L^8 = 1,8$ -bis(diphenylphosphino) octane, while  $Au_{22}$ -H-DFT represents the simplified model by replacing the bulky phenyl groups of the  $L^8$  ligands with H atoms.

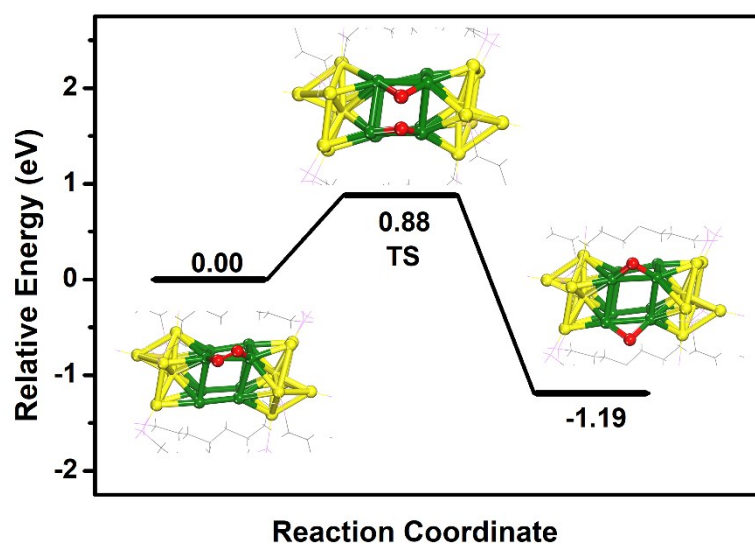

Fig. S2. The reaction pathway for dissociation of the chemisorbed  $O_2$  on  $Au_{22}(L^8)_6$  calculated at the GGA+U level ( $U_{\text{eff}} = 5.0$  eV).

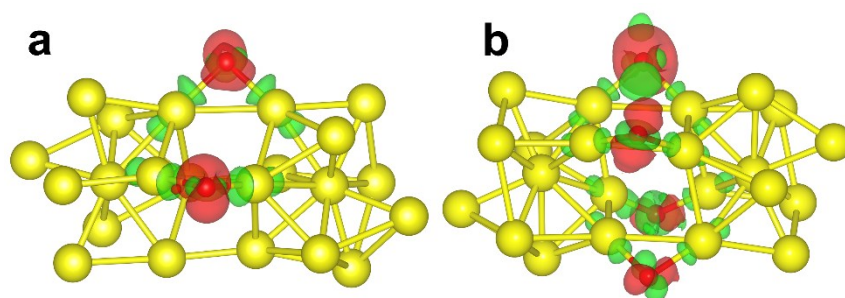

Fig. S3. The charge density difference of  $Au_{22}(L^8)_6$  with two and four adsorbed O atoms,  $Au_{22}(L^8)_6O_2$  for (a) and  $Au_{22}(L^8)_6O_4$  for (b). The red and green region represents the electron accumulation and depletion, respectively.
